# Supplementary material
Source: bioRxiv or medRxiv preprint supplement (https://medrxiv.org/highwire/filestream/82465/field_highwire_adjunct_files/1/2020.05.22.20110304-2.pdf)
Supplement: Supplementary file [file 2020.05.22.20110304-2.pdf]

1 [Importations of COVID-19 into African countries and risk of onward spread](#)

2 Haoyang Sun <sup>1,§</sup>, Borame L Dickens <sup>1</sup>, Alex R Cook <sup>1</sup>, Hannah E Clapham <sup>1,§</sup>

3

4 <sup>1</sup>Saw Swee Hock School of Public Health, National University of Singapore, 12 Science Drive 2, Singapore  
5 117549, Republic of Singapore

6

7 <sup>§</sup>Correspondence to:

8 Haoyang Sun. Saw Swee Hock School of Public Health, National University of Singapore, 12 Science Drive 2,  
9 Singapore 117549, Republic of Singapore. Email: [ephsunh@nus.edu.sg](mailto:ephsunh@nus.edu.sg).

10 Hannah E Clapham. Saw Swee Hock School of Public Health, National University of Singapore, 12 Science Drive  
11 2, Singapore 117549, Republic of Singapore. Email: [hannah.clapham@nus.edu.sg](mailto:hannah.clapham@nus.edu.sg).

12

13

14

Supporting Information

15 Statistical analyses

16 *Estimating the number of imported cases*

17 For each African country  $r$ , we denote the daily number of air passengers that arrived from an  
18 epicentre country  $e$  by  $v_{e \rightarrow r}^{(t)}$  ( $t = t_e, t_e + 1, \dots, T_{e \rightarrow r}$ ), where  $t_e$  refers to the start date of the  
19 COVID-19 epidemic in the epicentre country  $e$ , and  $T_{e \rightarrow r}$  refers to the last day that non-citizens and  
20 non-residents travelling from country  $e$  were allowed to enter country  $r$ . Each day the probability  
21 that an air passenger travelling from country  $e$  to country  $r$  was an imported case is denoted by  $p_e^{(t)}$ ,  
22 which we assume to be dependent on both the origin country  $e$  and time  $t$ , but independent from  
23 the destination country  $r$ . Hence, the total number of COVID-19 cases imported from an epicentre  
24 country  $e$  to an African country  $r$  by the time the travel ban came into force (denoted by  $M_{e \rightarrow r}$   
25 below) can be expressed as the sum of the following independent binomial random variables (i.e.  
26 daily number of infections imported from  $e$  to  $r$ ):

27 
$$M_{e \rightarrow r} = \sum_{t=t_e}^{T_{e \rightarrow r}} M_{e \rightarrow r}^{(t)},$$

28 
$$M_{e \rightarrow r}^{(t)} \sim \text{Bin} \left( v_{e \rightarrow r}^{(t)}, p_e^{(t)} \right).$$

29 Given that in most cases the daily number of air travellers  $v_{e \rightarrow r}^{(t)}$  before the travel ban came into  
30 force was reasonably large ( $\geq 20$ ), the random variable  $M_{e \rightarrow r}$  can be approximated using a Poisson  
31 distribution:

32 
$$M_{e \rightarrow r} \sim \text{Po} \left( \sum_{t=t_e}^{T_{e \rightarrow r}} v_{e \rightarrow r}^{(t)} \cdot p_e^{(t)} \right).$$

33 We used the imported COVID-19 case data reported by Singapore as well as flight data to provide a  
34 conservative estimate for  $M_{e \rightarrow r}$ , under the assumption that Singapore, being one of the countries  
35 with the highest surveillance capacity<sup>1</sup>, has detected all the imported cases. Owing to the delay from  
36 infection to hospital admission, we considered all cases imported from country  $e$  to Singapore that  
37 were *reported* by date ( $T_{e \rightarrow r} + 9$ ) (hereinafter denoted as  $SG_{e,r}$ ) based on Linton et al.'s estimated  
38 mean incubation period and time from illness onset to hospital admission<sup>2</sup>. We assumed that the  
39 ratio between the daily number of air travellers from epicentre  $e$  to country  $r$  and to Singapore  
40 remained stable in the presence of the changes in flight pattern in response to the COVID-19  
41 pandemic. Hence, the ratio between the expected numbers of cases imported from epicentre  $e$  to  
42 African country  $r$  and to Singapore can be derived using the March 2017 flight data:

43 
$$\frac{\mathbb{E}[M_{e \rightarrow r}]}{\mathbb{E}[SG_{e,r}]} = \frac{\sum_{t=t_e}^{T_{e \rightarrow r}} v_{e \rightarrow r}^{(t)} \cdot p_e^{(t)}}{\sum_{t=t_e}^{T_{e \rightarrow r}} v_{e \rightarrow SG}^{(t)} \cdot p_e^{(t)}} = \frac{\sum_{t \text{ in Mar 17}} v_{e \rightarrow r}^{(t)}}{\sum_{t \text{ in Mar 17}} v_{e \rightarrow SG}^{(t)}}.$$

44 This allows us to model  $M_{e \rightarrow r}$  (and  $SG_{e,r}$ ) as Poisson random variables with mean parameters  
 45 proportional to the numbers of air passengers travelling from epicentre  $e$  to country  $r$  (and to  
 46 Singapore) using the March 2017 flight data:

47 
$$M_{e \rightarrow r} \sim Po\left(\beta_{e,r} \cdot \sum_{t \text{ in Mar 17}} v_{e \rightarrow r}^{(t)}\right),$$

48 
$$SG_{e,r} \sim Po\left(\beta_{e,r} \cdot \sum_{t \text{ in Mar 17}} v_{e \rightarrow SG}^{(t)}\right).$$

49 Here,  $\beta_{e,r}$  refers to the proportionality constant to be estimated using the reported value of  $SG_{e,r}$   
 50 and flight data, and was assigned a uniform prior with support (0, 1). We performed Markov Chain  
 51 Monte Carlo to sample from the posterior distribution of  $\beta_{e,r}$  using the JAGS software<sup>3</sup>, with 20,000  
 52 iterations burn-in and 150,000 iterations thinned for a posterior sample of size 5,000. The posterior  
 53 sample for all the model parameters was then used to estimate the uncertainty distribution of the  
 54 total number of COVID-19 cases imported from the 12 major epicentres to each country.

55 In March 2020, a spike in the number of cases imported from United Kingdom and United States was  
 56 observed in Singapore, which was partly due to the increase in the number of returning Singaporean  
 57 students studying overseas<sup>4</sup>. This change in flight patterns, however, may not be applicable to all  
 58 African countries. Therefore, to be even more conservative, we also derived the imported case count  
 59 estimates excluding United Kingdom and United States from the 12 epicentre countries previously  
 60 considered. The resulting estimates were subsequently used in the simulations of the onward spread  
 61 of SARS-CoV-2 to get our estimates of case numbers over time.

62 *Simulating the onward transmission following importation*

63 We performed 1,000 simulations drawing from our estimated distribution of the number of  
 64 imported cases to project the onward spread of SARS-CoV-2 in each country up to 31<sup>st</sup> May 2020 or  
 65 the date when we estimate 10,000 infections was reached, whichever was earlier. The time of  
 66 infection for the cases imported from country  $e$  to country  $r$  was simulated via resampling from the  
 67 reporting dates of the  $SG_{e,r}$  cases, which was then shifted backwards by 9 days to account for the  
 68 delay from infection to hospital admission based on Linton et al.'s estimates<sup>2</sup>. To account for the  
 69 effect of quarantine measures on the onward transmission, we only included the estimated  
 70 imported cases who had acquired the infection prior to the mandatory quarantine of travellers  
 71 coming into force, so that the estimation of local SARS-CoV-2 spread is conservative. Hence,  
 72 following Cori et al.<sup>5</sup>, in each simulation  $s$ , the total infectiousness of the infected individuals in a

73 country  $r$  on day  $t$  (denoted by  $\widetilde{I}_r^{(t)}[s]$ ) can be expressed as the weighted sum of the past incident  
 74 infections (considered up to 14 days prior to  $t$ ):

$$75 \quad \widetilde{I}_r^{(t)}[s] = \sum_{u=1}^{14} \omega_u \cdot I_r^{(t-u)}[s].$$

76 In the equation above,  $I_r^{(t-u)}[s]$  denotes the number of incident infections in country  $r$  on day ( $t -$   
 77  $u$ ) generated in simulation  $s$ , which included both the number of incident local infections and the  
 78 *effective* number of imported infections (i.e. after adjusted for the effect of mandatory quarantine  
 79 measures, if applicable) whose *infection date* was ( $t - u$ ). The weight parameter  $\omega_u$  can be derived  
 80 from the cumulative distribution function of COVID-19's serial interval based on Nishiura et al.'s  
 81 estimate (denoted by  $F(\cdot)$ )<sup>6</sup>:

$$82 \quad \omega_u = \int_{u-1}^u F(\tau + 1) - F(\tau) d\tau.$$

83 Following Pearson et al.<sup>7</sup>, we assumed the number of secondary cases produced by each COVID-19  
 84 case to follow a negative binomial distribution with mean 2.0 and dispersion parameter 0.58, before  
 85 stay-at-home order came into force. In the presence of stay-at-home order, we created two  
 86 scenarios for the percentage reduction of the reproduction number: (1) 25% reduction, and (2) 50%  
 87 reduction. To be conservative, we assumed that the stay-at-home order, once implemented, can be  
 88 sustained up to the end date of our simulations. Hence, following the algorithm implemented by  
 89 Churcher et al.<sup>8</sup>, in each simulation  $s$  we generated the number of incident local infections in  
 90 country  $r$  on day  $t$  ( $A_r^{(t)}[s]$ ) as follows:

$$91 \quad A_r^{(t)}[s] \sim NB \left( \widetilde{I}_r^{(t)}[s] \cdot 0.58, \left( 1 + \frac{R_{0r}^{(t)}}{0.58} \right)^{-1} \right).$$

92 The negative binomial distribution above modelled the number of failures before the  $\widetilde{I}_r^{(t)}[s] \cdot 0.58^{\text{th}}$   
 93 success in a Bernoulli process with a success probability  $\left( 1 + \frac{R_{0r}^{(t)}}{0.58} \right)^{-1}$  for each trial, where  $R_{0r}^{(t)}$   
 94 denotes the instantaneous reproduction number in country  $r$  on day  $t$  as defined by Cori et al.<sup>5</sup>  
 95 Finally, based on the results obtained from the 1,000 simulations, we derived the estimated  
 96 probability of reaching 10,000 infections by end of March, April, and May respectively for each  
 97 African country.

98 References

- 99 1. Niehus R, Salazar PM De, Taylor A, Lipsitch M. Quantifying bias of COVID-19 prevalence and  
100 severity estimates in Wuhan, China that depend on reported cases in international travelers.  
101 medRxiv. 2020;
- 102 2. Linton NM, Kobayashi T, Yang Y, Hayashi K, Akhmetzhanov AR, Jung S, et al. Incubation Period  
103 and Other Epidemiological Characteristics of 2019 Novel Coronavirus Infections with Right  
104 Truncation: A Statistical Analysis of Publicly Available Case Data. *J Clin Med* [Internet]. 2020  
105 Feb 17;9(2):538. Available from: <https://www.mdpi.com/2077-0383/9/2/538>
- 106 3. Plummer M. JAGS : A program for analysis of Bayesian graphical models using Gibbs  
107 sampling. In 2003. Available from: <http://www.ci.tuwien.ac.at/Conferences/DSC-2003/>
- 108 4. Elangovan N, Lim J. Covid-19: S'porean students abroad heading home after government  
109 advisory but a few plan to stay put [Internet]. TODAY. 2020 [cited 2020 Apr 11]. Available  
110 from: [https://www.todayonline.com/singapore/covid-19-sporean-students-overseas-](https://www.todayonline.com/singapore/covid-19-sporean-students-overseas-prepare-head-home-after-government-advisory-few-vow)  
111 [prepare-head-home-after-government-advisory-few-vow](https://www.todayonline.com/singapore/covid-19-sporean-students-overseas-prepare-head-home-after-government-advisory-few-vow)
- 112 5. Cori A, Ferguson NM, Fraser C, Cauchemez S. A New Framework and Software to Estimate  
113 Time-Varying Reproduction Numbers During Epidemics. *Am J Epidemiol* [Internet]. 2013 Nov  
114 1;178(9):1505–12. Available from: [https://academic.oup.com/aje/article-](https://academic.oup.com/aje/article-lookup/doi/10.1093/aje/kwt133)  
115 [lookup/doi/10.1093/aje/kwt133](https://academic.oup.com/aje/article-lookup/doi/10.1093/aje/kwt133)
- 116 6. Nishiura H, Linton NM, Akhmetzhanov AR. Serial interval of novel coronavirus (COVID-19)  
117 infections. *Int J Infect Dis* [Internet]. 2020 Apr;93:284–6. Available from:  
118 <https://linkinghub.elsevier.com/retrieve/pii/S1201971220301193>
- 119 7. Pearson CAB, Schalkwyk C Van, Foss A, O'Reilly K, SACEMA's Modelling and Analysis Response  
120 Team, CMMID COVID-19 working group, et al. Projection of early spread of COVID-19 in  
121 Africa as of 25 March 2020 [Internet]. 2020. Available from:  
122 [https://cmmid.github.io/topics/covid19/current-patterns-](https://cmmid.github.io/topics/covid19/current-patterns-transmission/reports/COVID10k_Africa.pdf)  
123 [transmission/reports/COVID10k\\_Africa.pdf](https://cmmid.github.io/topics/covid19/current-patterns-transmission/reports/COVID10k_Africa.pdf)
- 124 8. Churcher TS, Cohen JM, Novotny J, Ntshalintshali N, Kunene S, Cauchemez S. Measuring the  
125 path toward malaria elimination. *Science* (80- ) [Internet]. 2014 Jun 13;344(6189):1230–2.  
126 Available from: <http://www.sciencemag.org/cgi/doi/10.1126/science.1251449>
